# Supplementary material for: Effect of Flaxseed Supplementation on Milk and Plasma Fatty Acid Composition and Plasma Parameters of Holstein Dairy Cows
Source: MDPI journal article supplement (doi:10.3390/ani12151898), 2022-07-26
Supplement: s1 [file s1]

Supplementary Table S1. Composition of experimental diets (% DM basis).

| Items                                        | Treatments <sup>1</sup> |       |       |
|----------------------------------------------|-------------------------|-------|-------|
|                                              | CK                      | WF    | GF    |
| Diet ingredient, % of DM                     |                         |       |       |
| Corn Silage                                  | 21.51                   | 21.86 | 21.86 |
| Alfalfa hay                                  | 8.76                    | 8.90  | 8.90  |
| Alfalfa semi-dry silage                      | 3.61                    | 3.67  | 3.67  |
| Wrapped straw                                | 2.44                    | 2.48  | 2.48  |
| Corn                                         | 26.18                   | 21.56 | 21.56 |
| Corn flakes                                  | 2.77                    | 2.82  | 2.82  |
| Wool cotton seed                             | 3.88                    | 1.97  | 1.97  |
| Orange peel granule                          | 1.94                    | 1.97  | 1.97  |
| Soybean meal                                 | 12.42                   | 11.8  | 11.8  |
| Puffed soybeans                              | 2.22                    | 2.26  | 2.26  |
| Cotton meal                                  | 3.12                    | 3.17  | 3.17  |
| DDGS                                         | 2.85                    | 2.90  | 2.90  |
| Bran                                         | 1.08                    | 1.10  | 1.10  |
| Fat powder                                   | 1.71                    | 1.55  | 1.55  |
| Flaxseed                                     | 0                       | 6.38  | 6.38  |
| Premix <sup>2</sup>                          | 5.51                    | 5.60  | 5.60  |
| Total                                        | 100                     | 100   | 100   |
| Chemical, % of DM                            |                         |       |       |
| DM                                           | 51.18                   | 51.27 | 53.58 |
| CP                                           | 17.19                   | 17.48 | 17.48 |
| ADF                                          | 17.99                   | 19.30 | 17.08 |
| NDF                                          | 63.15                   | 65.70 | 61.23 |
| NE <sub>L</sub> <sup>3</sup> , Mcal/kg of DM | 1.91                    | 1.94  | 1.94  |

DDGS = distillers dried grains with solubles; DM = dry matter; CP crude protein; ADF = acid detergent fiber; NDF = neutral detergent fiber; NE<sub>L</sub> = Net energy for lactation.

<sup>1</sup> CK = dairy cows fed a basal diet (without flaxseed); WF = dairy cows with whole flaxseed diet (whole flaxseed 1,500 g per day); GF = dairy cows with ground flaxseed diet (ground flaxseed 1,500 g per day).

<sup>2</sup> Premix (per kg of DM): a minimum of 313,500 IU of vitamin A, 104,500 IU of vitamin D, 5,000 IU of vitamin E, 780 mg of Cu, 780 mg of Fe, 780 mg of Mn, 3,900 mg of Zn, 30 mg of Se, 50 mg of I, and 65 mg of Co.

<sup>3</sup> Calculated value (based on China Standard NY/T 34; People's Republic of China, 2004).
